# Supplementary material for: Talking about Familial Breast and Ovarian Cancer Risk—Evaluation of a Psychosocial Training Module for Gynecologists in Germany
Source: MDPI journal article supplement (doi:10.3390/cancers16020310), 2024-01-11
Supplement: s1 [file s1]

**Supplementary Table S1.** Participant characteristics (*n* = 35).

|                                                                       |             |
|-----------------------------------------------------------------------|-------------|
| Female sex, n (%)                                                     | 35 (100)    |
| Age, M (SD)                                                           | 48.1 (10.2) |
| Higher education <sup>1</sup> , n (%)                                 | 29 (82.8)   |
| Diagnosis of breast cancer, n (%)                                     | 19 (54.3)   |
| Diagnosis of ovarian cancer, n (%)                                    | 6 (17.1)    |
| No diagnosis of cancer, n (%)                                         | 13 (37.1)   |
| Number of breast or ovarian cancer diagnoses<br>in the family, n (%)  |             |
| 0                                                                     | 2 (5.7)     |
| 1                                                                     | 11 (31.4)   |
| 2                                                                     | 8 (22.9)    |
| 3 or more                                                             | 14 (40.0)   |
| First information about genetic testing was<br>obtained by/through... |             |
| oncologist, n (%)                                                     | 15 (42.9)   |
| family/relatives, n (%)                                               | 8 (22.9)    |
| gynecologist, n (%)                                                   | 6 (17.1)    |
| friends, n (%)                                                        | 2 (5.71)    |
| internet, n (%)                                                       | 1 (2.86)    |
| other, n (%)                                                          | 3 (8.57)    |

*Notes.* <sup>1</sup>Higher education refers to ≥12 or 13 years of schooling (highest educational degree in the German schooling system).
